# Supplementary material
Source: PubMed Central journal article supplement (PMC8710257)
Supplement: NIHMS1742436-supplement-A_model_for__stretch_growth_of_neuron_Supplement.pdf [file NIHMS1742436-supplement-A_model_for__stretch_growth_of_neuron_Supplement.pdf]

335 **APPENDIX**

336 *A.1. Sensitivity analysis of the non-dimensional equations for stretch growth*

337 Our goal in this section of the appendix is to show how the solutions of the non-dimensional equations written in  
338 section 4 are affected by changes in the parameters  $\chi_1$ ,  $\chi_2$  and  $\chi_3$ . Recall that we used  $\chi_1 = 5.7$ ,  $\chi_2 = 0$  and  $\chi_3 = 5.2$   
339 in the main text . A change in the diffusion coefficient is reflected in  $\chi_1$ , a change in passive (advective) transport is  
340 reflected in  $\chi_2$ , and a change in geometry is reflected in  $\chi_3$ . In figure .6 we plot the curves of  $L(t)$  and  $Q_t(t)$  versus  
341 time  $t$  for the same initial conditions, but different dimensionless parameters  $\chi_1$ ,  $\chi_2$  and  $\chi_3$ . In particular, increasing  $\chi_1$   
342 by three orders of magnitude has negligible effect on the curves for  $L(t)$  and  $Q_t(t)$ . This suggests that diffusion plays  
343 a minor role in the growth process. The transport parameter  $\chi_2$  and the geometric parameter  $\chi_3$  are more important  
344 since small changes in them cause big shifts in the  $L(t)$  and  $Q_t(t)$  profiles.

345 *A.2. Isotropic tension in axon membrane*

346 We mention in the main text that the isotropic membrane tension  $\tau$  is related to the axon cross-sectional area  
347  $A = \pi R^2$  and the pressure difference  $p$  between the inside and outside of a cell through [26]

$$\tau = pR, \tag{A-1}$$

348 where  $R$  is the radius of the axon. We will now discuss the conditions under which this equation is valid. To begin we  
 349 recall a study on red blood cell membranes by Evans and Hochmuth [7] in which they consider a cylindrical portion of  
 350 the membrane (such as one sucked into a micropipette). They recognize that the membrane is a viscoelastic material  
 351 undergoing large deformations and give the following relations for the stress components  $T_{11}$  and  $T_{22}$  respectively  
 352 along the longitudinal and circumferential directions in terms of the stretches  $\lambda_1$  and  $\lambda_2$ :

$$T_{11} = -P_m + \frac{\mu}{2}(\lambda_1^2 - 1) + 2\eta_e \frac{\dot{\lambda}_1}{\lambda_1}, \quad (\text{A-2})$$

$$T_{22} = -P_m + \frac{\mu}{2}(\lambda_2^2 - 1) + 2\eta_e \frac{\dot{\lambda}_2}{\lambda_2}, \quad (\text{A-3})$$

353 where  $\mu$  is the shear modulus of the membrane,  $\eta_e$  is a viscosity and  $P_m$  is an isotropic tension that enforces the  
 354 constraint that the red cell membrane is inextensible so that  $\lambda_1\lambda_2 = 1$ . By virtue of inextensibility the equation for  $T_{22}$   
 355 above can be written as

$$T_{22} = -P_m + \frac{\mu}{2}(\lambda_1^{-2} - 1) - 2\eta_e \frac{\dot{\lambda}_1}{\lambda_1}. \quad (\text{A-4})$$

356 If these relations are assumed valid for the viscoelastic membrane of an axon then when we stretch it in the longitudinal  
 357 direction  $\lambda_1 > 1$  and  $\dot{\lambda}_1 > 0$ , so  $\lambda_2 < 1$  and  $\dot{\lambda}_2 < 0$ . Thus, on short time scales, when growth has not occurred, the  
 358 axon diameter will become smaller if its length is increased. We also see from (A-2) and (A-3) that when  $\lambda_1 > 1$  and  
 359  $\dot{\lambda}_1 > 0$  the stress  $T_{11}$  increases while  $T_{22}$  decreases. Now, the increase in  $T_{11}$  will cause mechanosensitive ion channels  
 360 to open, which will result in an increase in the production rate of monomers  $I$  (as we explain in the main text) and  
 361 eventually cause growth. Thus, over long time scales when new material is added to the axon the stress  $T_{11}$  will go  
 362 down.

363 For the red cell membrane Hochmuth *et al.* [18] measured  $\eta_e = 10^{-6}$  Ns/m and  $\mu = 6 \times 10^{-6}$  N/m. We will use  
 364 these numbers to make estimates for axonal membranes because it has been shown recently [46] that underneath the  
 365 axon membrane are spectrin filaments connected by actin rings. These are the same components that make up red cell  
 366 membranes [1]. Now, for an axon  $\lambda_1 = 1 + \frac{\Delta L}{L}$  where  $L$  is the length of the cylinder and  $\Delta L$  is the change in length  
 367 caused by pulling in the absence of growth. Hence, the strain rate  $\dot{\lambda}_1 = \frac{U}{L}$  where  $U$  is the pulling velocity which is on  
 368 the order of 1 mm/day in the experiments described in Pfister *et al.* [31] and Smith [40]. For a 1 mm long axon the  
 369 viscous term cannot be larger (since  $\lambda_1 > 1$  in tension) than  $2 \times 10^{-6} \times \frac{1}{(24 \times 3600)}$  N/m  $\approx 0.02 \times 10^{-6}$  N/m. This is orders  
 370 of magnitude smaller than  $0.04 \times 10^{-3}$  N/m measured by Dai *et al.* [4] in experiments on molluscan neurons. Hence,  
 371 viscous effects can be neglected for our stretch grown axons and the process can be assumed quasistatic.

372 What about the elastic term? In the experiments described in [40] the axons are stretched in steps of  $3.5\mu\text{m}$  every  
 373 5 minutes. For a 1 mm long axon in the absence of growth this corresponds to  $\lambda_1 = 1.0035$ . Hence, the elastic  
 374 contribution to the stress is  $6 \times 10^{-6} \times (1.007 - 1) = 42 \times 10^{-9}$  N/m which is again negligible in comparison to the  
 375  $0.04 \times 10^{-3}$  N/m in [4]. If membrane is being added due to growth then  $\lambda_1$  over a 5 minute period will be still smaller  
 376 and we can safely neglect it. Hence, for long axons we can approximate  $T_{11} = T_{22} = \tau$  where  $\tau$  is an isotropic tension

377 in the axon membrane.

378 For a cylindrical membrane of radius  $R$  (like an axon) under isotropic tension the equilibrium equation can be  
379 obtained following [24] and is given by:

$$p - \frac{\tau}{R} - \frac{K_b}{2R^3} = 0. \quad (\text{A-5})$$

380 Here,  $p$  (pressure) is a Lagrange multiplier that enforces a constraint of constant volume enclosed by the membrane  
381 (due to osmotic considerations),  $\tau$  (tension) is a Lagrange multiplier that enforces a constraint of membrane inex-  
382 tensibility and  $K_b$  is the membrane bending modulus.  $K_b$  for a red cell membrane is  $20kT$  [1] while  $R$  for an axon is  
383 about  $1\mu\text{m}$ . The tension  $\tau$  is on the order of  $0.05 \times 10^{-3}\text{N/m}$ . Hence, the bending term above is about two orders of  
384 magnitude smaller than the tension term. If we neglect the bending term then we recover (A-1).

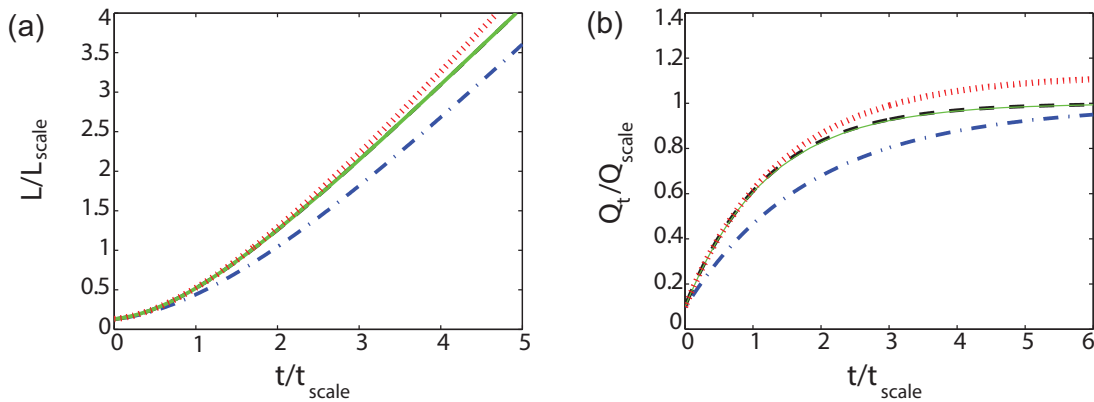

Figure .6: Sensitivity of (a)  $L(t)$ , and (b)  $Q_t(t)$  profiles to changes in non-dimensional parameters  $\chi_1, \chi_2$  and  $\chi_3$  (see the appendix). The green lines in (a) and (b) show the  $L(t)$  and  $Q_t(t)$  curves, respectively, for  $\chi_1 = 5.7, \chi_2 = 0.0, \chi_3 = 5.2$ , black dashed lines for  $\chi_1 = 5700, \chi_2 = 0.0, \chi_3 = 5.2$ , blue dot-dashed lines for  $\chi_1 = 5.7, \chi_2 = 0.0, \chi_3 = 1.2$  and red dotted lines for  $\chi_1 = 5.7, \chi_2 = 0.1, \chi_3 = 5.2$ . Changing  $\chi_1$  by three orders of magnitude has negligible effect on these trajectories. This means that diffusion plays a very minor role in the growth process.

## References

Evans, E. A. and Hochmuth, RM, 1976, Membrane viscoelasticity, Biophysical Journal 96(16), 1-11.

Hochmuth, R.M., Worthy, P. R. and Evans, EA, 1979. Red cell extensional recovery and the determination of membrane viscosity, Biophysical Journal 26, 101-114

Julicher, F. and Seifert, U, 1994. Shape equations for axisymmetric vesicles: A clarification, Phys. Rev E 49(5), 4728-4731.

Xu, K, Zhong, G and Zhuang, X, 2013. Actin, spectrin, and associated proteins form a periodic cytoskeletal structure in axons, Science 339, 452-456.
